# Supplementary material for: Caregivers’ Perceptions and Hospital Experience After a Brief Resolved Unexplained Event: A Qualitative Study
Source: Oxford University Press journal article supplement (doi:10.1542/hpeds.2018-0220), 2019-07-01
Supplement: hpeds_2018-0220supplementarydata.pdf [file hpeds_2018-0220supplementarydata.pdf]

## Supplemental Information

The following is a semistructured interview guide with suggested probing questions:

1. Tell me why you are here in the hospital.
  - a. What went through your head when it happened?
  - b. What do you think happened?
2. What concerned you the most that made you come to the hospital?
  - a. Did you think he needed to be admitted?
3. Thinking back to the conversations you had with the medical team, how did they explain to you what had happened?
  - a. What did you think when they said that to you? What do you think of that explanation?
  - b. How do you explain what happened?
4. Tell me more about how conversations with the medical team have gone for you during this hospital stay.
  - a. Can you give an example of something you talked about?
5. Did you have an idea of what to expect when talking to the medical team?
  - a. Did you have an idea of what you wanted from the medical team when you first came?
6. Tell me about what testing or monitoring has been done over the past day.
  - a. How do you feel? What do you think about what is been done in the hospital?
  - b. What is it like being in the hospital?
7. Has the team talked to you yet about a plan for going home?
  - a. How did that conversation go?
  - b. Do you feel ready to go home? What would make you feel ready?
8. What will it be like at home now? Will anything be different?
  - a. Can you give me an example?
